# Supplementary material
Source: MDPI journal article supplement (https://www.mdpi.com/2075-163X/13/1/60)
Supplement: s1 [file s1]

# Supplementary Materials: Role of Clay Mineralogy in the Stabilization of Soil Organic Carbon in Olive Groves under Contrasted Soil Management

Julio Calero \*, Roberto García-Ruiz, Milagros Torrús-Castillo, José L. Vicente-Vicente and Juan M. Martín-García

**Table S1.** Pearson's correlation coefficients between SOC functional fractions (%), soil properties of the fine earth (>2 mm) and mineral phases in the <2 µm fraction (%).

|                                | Non Protected (NPP) |               |                | Chemically Protected | Biochemically Protected | Physically Protected (PPP) |                |        |                 |
|--------------------------------|---------------------|---------------|----------------|----------------------|-------------------------|----------------------------|----------------|--------|-----------------|
|                                | cPOM                | LF            | Total NPP      | H                    | NH                      | µNH                        | µH             | iPOM   | Total (PPP)     |
| SOC (%)                        | <b>0.759*</b>       | <b>0.756*</b> | <b>0.909**</b> | <b>-0.892**</b>      | -0.476                  | 0.510                      | <b>-0.728*</b> | 0.067  | <b>-0.903**</b> |
| pH                             | 0.276               | -0.346        | 0.077          | 0.334                | -0.692                  | 0.620                      | <b>0.708*</b>  | 0.244  | 0.010           |
| Sand (%)                       | -0.099              | 0.458         | 0.101          | -0.510               | 0.498                   | -0.434                     | <b>-0.797*</b> | -0.011 | -0.152          |
| Clay (%)                       | -0.092              | -0.426        | -0.227         | 0.591                | -0.220                  | 0.196                      | 0.702          | -0.258 | 0.171           |
| Silt (%)                       | 0.438               | -0.255        | 0.232          | -0.002               | <b>-0.753*</b>          | 0.648                      | 0.466          | 0.573  | 0.010           |
| CEC (cmol + kg <sup>-1</sup> ) | 0.571               | 0.046         | 0.487          | -0.282               | -0.521                  | 0.477                      | -0.065         | 0.099  | -0.477          |
| Sm                             | -0.132              | -0.248        | -0.159         | 0.395                | -0.199                  | 0.163                      | 0.529          | 0.057  | 0.224           |
| V                              | 0.399               | 0.736         | 0.606          | -0.656               | -0.070                  | 0.027                      | 0.166          | -0.545 | -0.713          |
| Illite                         | 0.247               | -0.053        | 0.206          | -0.258               | -0.128                  | 0.075                      | -0.244         | 0.384  | -0.193          |
| ML (%)                         | <b>-0.727*</b>      | -0.473        | <b>-0.728*</b> | 0.443                | <b>0.810*</b>           | <b>-0.794*</b>             | 0.088          | -0.229 | 0.695           |
| MLV                            | -0.233              | -0.021        | -0.316         | 0.300                | 0.271                   | -0.316                     | 0.248          | -0.375 | 0.303           |
| MLS                            | 0.497               | -0.699        | 0.495          | -0.161               | -0.620                  | 0.707                      | 0.197          | 0.219  | -0.414          |
| Chl                            | 0.470               | 0.668         | 0.643          | -0.627               | -0.287                  | 0.300                      | -0.579         | -0.189 | <b>-0.743*</b>  |
| K                              | -0.174              | 0.201         | -0.130         | -0.168               | 0.455                   | -0.410                     | -0.360         | -0.249 | 0.104           |
| FdK                            | 0.039               | -0.170        | 0.012          | 0.295                | -0.309                  | 0.267                      | 0.425          | 0.036  | -0.021          |
| FdCa-Na                        | 0.390               | 0.274         | 0.395          | -0.306               | -0.456                  | 0.354                      | -0.099         | 0.607  | -0.296          |
| Q.                             | -0.340              | -0.147        | -0.321         | 0.116                | 0.199                   | -0.282                     | 0.096          | 0.625  | 0.506           |
| Calcite                        | -0.004              | -0.410        | -0.168         | 0.562                | -0.510                  | 0.463                      | <b>0.885**</b> | 0.097  | 0.261           |

CEC: Cation Exchange Capacity; Sm: Smectite; V: Vermiculite; ML: mixed layers; Chl: Chlorite; K: Kaolinite; FdK: Potassium Feldspar; FdCa-Na: Calcium-Sodium Feldspar; Q: Quartz; NH: Non-hydrolysable organic carbon, biochemically protected; µNH: Non-hydrolysable organic carbon, physically protected; H: Hydrolysable organic carbon, chemically protected; µNH: Hydrolysable organic carbon, physically protected; LF: light fraction, non-protected; iPOM: occluded particulate organic matter, physically protected; cPOM: coarse particulate organic matter, non-protected; P-P: protected pool. Significance: \* < 0.05. \*\* < 0.01.

**Table S2.** Pearson's correlation coefficients between SOC functional fractions (%) and some properties of the <2  $\mu\text{m}$  fraction (%).

|                                                    | Non Protected (NPP) |        |           | Chemically Protected | Biochemically Protected | Physically Protected (PPP) |                 |        |             |
|----------------------------------------------------|---------------------|--------|-----------|----------------------|-------------------------|----------------------------|-----------------|--------|-------------|
|                                                    | cPOM                | LF     | Total NPP | H                    | NH                      | $\mu\text{NH}$             | $\mu\text{H}$   | iPOM   | Total (PPP) |
| SSA <sub>clay</sub> ( $\text{m}^2 \text{g}^{-1}$ ) | 0.226               | -0.229 | 0.132     | 0.079                | -0.371                  | 0.358                      | 0.199           | 0.176  | -0.176      |
| Fe <sub>2</sub> O <sub>3clay</sub> (%)             | 0.188               | 0.638  | 0.355     | -0.632               | 0.323                   | -0.216                     | <b>-0.851**</b> | -0.429 | -0.463      |

SSA: specific surface area ( $\text{N}_2$  adsorption method); CEC: Cation Exchange Capacity. NH: Non-hydrolysable organic carbon, biochemically protected;  $\mu\text{NH}$ : Non-hydrolysable organic carbon, physically protected; H: Hydrolysable organic carbon, chemically protected;  $\mu\text{H}$ : Hydrolysable organic carbon, physically protected; LF: light fraction, non-protected; iPOM: occluded particulate organic matter, physically protected; cPOM: coarse particulate organic matter, non-protected; P-P: protected pool. Significance: \* $< 0.05$ . \*\* $< 0.01$ . \*\*\* $< 0.001$ .

**Table S3.** Pearson's correlation coefficients between mineral phases in <2  $\mu\text{m}$  fraction (%) and some properties of the fine earth and <2  $\mu\text{m}$  fraction (%).

|                                                    | Phyllosilicates |               |               |                |        |        |               | Tectosilicates |                |               |        | Calcite        |
|----------------------------------------------------|-----------------|---------------|---------------|----------------|--------|--------|---------------|----------------|----------------|---------------|--------|----------------|
|                                                    | Sm              | V             | Illite        | ML             | MLV    | MLS    | Chl           | K              | FdK            | FdCa-Na       | Q      |                |
| SOC (%)                                            | -0.310          | 0.659         | 0.318         | <b>-0.705*</b> | -0.412 | 0.152  | <b>0.747*</b> | -0.052         | -0.081         | 0.502         | -0.237 | -0.438         |
| pH                                                 | 0.358           | -0.545        | 0.284         | -0.553         | -0.047 | 0.527  | -0.327        | -0.684         | 0.603          | 0.467         | -0.214 | <b>0.768*</b>  |
| Sand (%)                                           | -0.548          | 0.509         | -0.086        | 0.275          | -0.159 | -0.640 | 0.565         | 0.672          | <b>-0.721*</b> | -0.248        | 0.214  | <b>-0.828*</b> |
| Clay (%)                                           | 0.557           | -0.360        | 0.090         | -0.081         | 0.193  | 0.615  | -0.621        | -0.674         | <b>0.800*</b>  | 0.131         | -0.327 | 0.651          |
| Silt (%)                                           | 0.163           | -0.413        | 0.019         | -0.502         | -0.010 | 0.255  | -0.070        | -0.219         | 0.071          | 0.331         | 0.167  | 0.651          |
| CEC ( $\text{cmol} + \text{kg}^{-1}$ )             | -0.164          | -0.102        | <b>0.798*</b> | <b>-0.735*</b> | -0.214 | 0.194  | -0.011        | -0.569         | 0.456          | <b>0.726*</b> | -0.615 | -0.014         |
| SSA <sub>clay</sub> ( $\text{m}^2 \text{g}^{-1}$ ) | -0.156          | -0.500        | <b>0.832*</b> | -0.584         | -0.455 | 0.361  | -0.036        | -0.631         | 0.431          | 0.615         | -0.488 | 0.094          |
| Fe <sub>2</sub> O <sub>3clay</sub> (%)             | -0.620          | <b>0.872*</b> | -0.117        | 0.162          | 0.065  | -0.440 | 0.638         | 0.701          | -0.677         | -0.384        | -0.253 | <b>-0.818*</b> |

Sm: Smectite; V: Vermiculite; ML: mixed layers; Chl: Chlorite; K: Kaolinite; FdK: Potassium Feldspar; FdCa-Na: Calcium-Sodium Feldspar; Q: Quartz; SSA: specific surface area ( $\text{N}_2$  adsorption method). CEC: Cation Exchange Capacity. Significance: \* $< 0.05$ .

**Table S4.** Pearson's correlation coefficients between properties of the fine earth and the <2  $\mu\text{m}$  fraction (%).

|                                        | Surface Properties of the Clay Fraction |                                    |
|----------------------------------------|-----------------------------------------|------------------------------------|
|                                        | SSA ( $\text{m}^2 \text{g}^{-1}$ )      | Fe <sub>2</sub> O <sub>3</sub> (%) |
| SOC (%)                                | 0.109                                   | 0.480                              |
| pH                                     | 0.656                                   | <b>-0.831*</b>                     |
| Sand (%)                               | -0.486                                  | <b>0.834*</b>                      |
| Clay (%)                               | 0.466                                   | -0.694                             |
| Silt (%)                               | 0.203                                   | -0.573                             |
| CEC ( $\text{cmol} + \text{kg}^{-1}$ ) | <b>0.820*</b>                           | -0.226                             |

SSA: specific surface area ( $\text{N}_2$  adsorption method); CEC: Cation Exchange Capacity. Significance: \* $< 0.05$ .
